# Supplementary material for: MEMO1 binds iron and modulates iron homeostasis in cancer cells
Source: eLife. 2024 Apr 19;13:e86354. doi: 10.7554/eLife.86354 (PMC11081632; doi:10.7554/eLife.86354)
Supplement: Figure 1—source data 1. [file elife-86354-fig1-data1.xlsx]

## Sheet: Sheet1
MEMO1 expression in various cancers compared to normal tissue
Cancer	P-value		Cancer	P-value
BLCA	2.12751e-06		LUAD	4.68196e-22
BRCA	3.26251e-30		LUSC	6.09466e-30
CESC	0.00331112		PAAD	0.0638294
CHOL	0.00452023		PCPG	0.00226365
COAD	2.40528e-16		PRAD	9.78645e-12
ESCA	0.00120775		READ	0.000513928
GBM	0.000370945		SARC	0.37995
HNSC	0.290489		SKCM	0.153983
KICH	0.00284503		STAD	6.0401e-05
KIRC	0.0168371		THCA	1.14176e-12
KIRP	0.251399		THYM	0.265979
LIHC	0.00089057		UCEC	2.95983e-16
		overexpressed in cancer
		underexpressed in cancer
		no change
